# Supplementary material
Source: PubMed Central journal article supplement (PMC4205657)
Supplement: pnas.201416864SI.pdf [file pnas.201416864SI.pdf]

# Supporting Information

Yang et al. 10.1073/pnas.1416864111

## SI Materials and Methods

**Peptide Binding Measurements.** For peptide binding assays, increasing concentrations of each nonbiotinylated test peptide were incubated in competition with 0.04  $\mu\text{M}$  biotinylated GAD65 253–265<sup>R255F</sup> peptide (IAFFKMFPEVKEK) in wells coated with HLA-DQ8 protein, as previously described (1, 2). Europium-conjugated streptavidin (PerkinElmer) was used to label biotinylated peptide bound to the HLA-DQ protein and was quantified using a Victor2 multilabel time-resolved fluorometer (PerkinElmer). Binding curves were fitted by nonlinear regression with a sigmoidal dose–response curve model using Prism software (v5.0, GraphPad Software).

**CD4 T-Cell Isolation, in Vitro Stimulation, and Tetramer Staining.** Peripheral blood mononuclear cells (PBMC) and negatively enriched CD4 cells were isolated and expanded in vitro as described previously (1, 3). Briefly,  $2.5 \times 10^6$  CD4 cells in a 48-well plate were stimulated with 6  $\mu\text{M}$  of either B:11-23 or modified B:11-23<sup>R22E</sup> peptide, in separate, duplicate wells. After about 14 d of in vitro stimulation, tetramer staining was performed, and positivity was defined as the presence of a distinct population of CD4 bright cells at a percentage more than twofold above background (staining of cells from the unstimulated well, set to 0.1% for most experiments).

**Insulin-Specific CD4<sup>+</sup> T-Cell Cloning and Proliferation Assays.** Single tetramer-positive T cells were cloned and expanded as previously described (1). Their antigen specificity was confirmed by tetramer staining. To assess the proliferative response of T-cell clones to peptide and denatured insulin,  $5 \times 10^4$  quiescent T cells of a desired clone and  $1.0 \times 10^5$  irradiated HLA-DQ8+PBMC in 200  $\mu\text{L}$  of T-cell culture medium [RPMI 1640 with 10% (vol/vol) pooled human serum] were stimulated in duplicate wells with 10-fold of serial dilutions of peptide or protein. After 48-h stimulation, each well was pulsed with 1  $\mu\text{Ci}$  of <sup>3</sup>H-thymidine (Amersham Biosciences) for 16 h. Peptide stimulatory activity was determined as the absolute radioactive <sup>3</sup>H cpm, or stimulation index (the ratio of <sup>3</sup>H cpm in the presence of peptide versus no-peptide).

**Western Blot Analysis of DQ8/Ins Complexes.** Intact B6K10 cells ( $3 \times 10^6$ ) were incubated with anti HLA-DQ8 monoclonal antibody SPVL3 for 1 h on ice. After washing to remove unbound antibody, cells were lysed in buffer containing 1% Triton X-100, protease inhibitors and 10 mM iodoacetamide, and immune complexes recovered using protein G Sepharose. The bound complexes were eluted from the beads using SDS/PAGE sample buffer with or without 10 mM DTT, and separated by SDS/PAGE. After transfer to nitrocellulose membranes DQ8  $\beta$ -chains were detected using an anti-FLAG monoclonal antibody M2 (Sigma), followed by goat anti-mouse IgG1-HRP (Jackson Immunoresearch), and ECL-Plus (Pierce).

1. Yang J, et al. (2008) CD4<sup>+</sup> T cells from type 1 diabetic and healthy subjects exhibit different thresholds of activation to a naturally processed proinsulin epitope. *J Autoimmun* 31(1):30–41.
2. Ettinger RA, Papadopoulos GK, Moustakas AK, Nepom GT, Kwok WW (2006) Allelic variation in key peptide-binding pockets discriminates between closely related diabetes-protective and diabetes-susceptible HLA-DQB1\*06 alleles. *J Immunol* 176(3):1988–1998.

3. Yang J, James EA, Sanda S, Greenbaum C, Kwok WW (2013) CD4<sup>+</sup> T cells recognize diverse epitopes within GAD65: Implications for repertoire development and diabetes monitoring. *Immunology* 138(3):269–279.

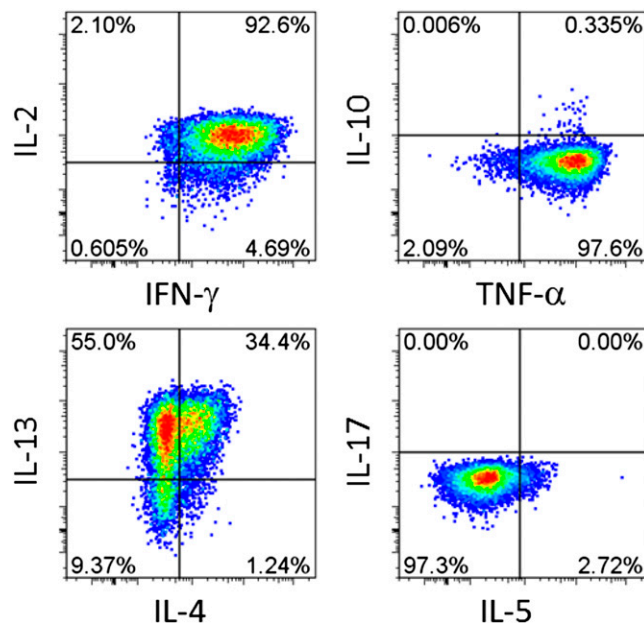

**Fig. S1.** Intracellular cytokine analysis for a representative insulin specific T-cell clone. A representative T-cell clone T1D#10 C2 was stimulated with PMA and ionomycin and stained intracellularly with anti-IL-2, IFN- $\gamma$ , IL-10, TNF- $\alpha$ , IL-10, IL-4, IL-5, and IL-17. Each panel shown is gated on live tetramer-positive cells and depicts staining for one pair of cytokines.

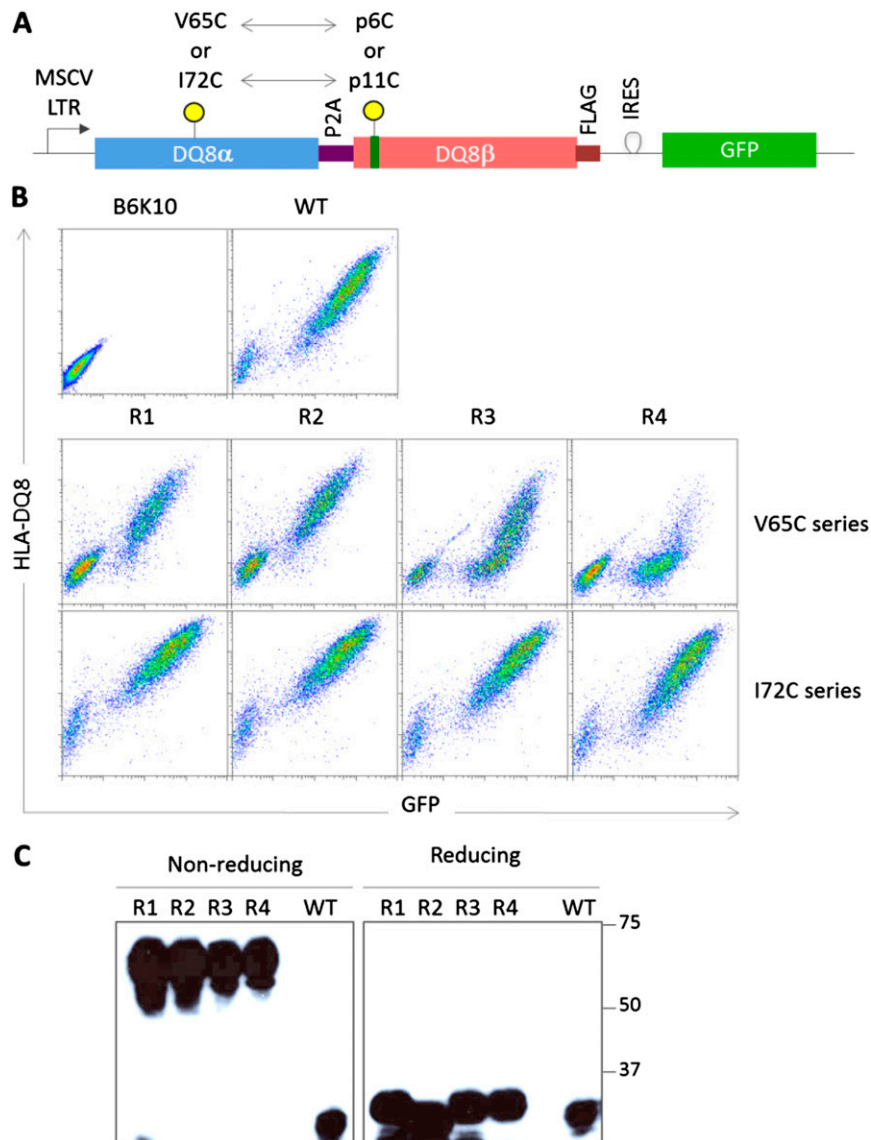

**Fig. S2.** Characterization of B6K10 cells expressing register fixed DQ8/Ins complexes. (A) Diagram of the murine stem cell virus-based retroviral constructs encoding HLA-DQ8 with variants of the B:11-23 peptide covalently attached to the mature N terminus of the DQ8  $\beta$ -chain. The position of introduced cysteine residues in the  $\alpha$ -chain (V65C or I72C) and antigenic peptide (at p6 or p11 of the designed binding register, respectively) are indicated. The  $\beta$ -chain is also tagged at its C terminus with a FLAG epitope for immunoblotting. Internal ribosome entry site-driven expression of GFP indicates the level of integrated viral DNA. (B) Expression level of the various HLA-DQ8 molecules with the linked and register-fixed peptides. The DQ8 molecules expressed on the cell surface of B6K10 transductants were stained with a PE-conjugated anti-HLA-DQ monoclonal antibody and analyzed by flow cytometry. (C) Analysis of disulfide bond formation. Disulfide bonding of surface-expressed DQ8 molecules was analyzed as described in *SI Materials and Methods*. The register-fixed constructs (R1, R2, R3, and R4) contain a pair of cysteines that form a disulfide bond linking the DQ8  $\alpha$ -chain to the DQ8  $\beta$ -chain through the antigenic peptide, and therefore are detected as an  $\alpha\beta$  dimer under nonreducing conditions by the epitope tag in the  $\beta$ -chain. This resolves into the individual monomers upon reduction. The wild-type construct contains only a single native cysteine in the peptide and provides a negative control for the nonreduced samples.



**Table S3. Sequences from microbial antigens that share homology with Ins B:11-23**

| Source organism                   | Accession no. of protein | Sequence*                 | Source |
|-----------------------------------|--------------------------|---------------------------|--------|
| Human                             | AEG19452                 | I <u>VEALYLV</u> CGEEG    |        |
| <i>Bacteroides salanitronis</i>   | YP_004259638             | GN <u>ALFLLC</u> GEEVKI   | (1)    |
| <i>Clostridium acetobutylicum</i> | NP_348681.1              | IK <u>EYLYLC</u> GEDKW    | (2)    |
| <i>Treponema phagedenis</i>       | ZP_08037042.1            | SEAD <u>ALYLV</u> SSEEVLY | (3)    |
| <i>Microscilla marina</i>         | ZP_01690034.1            | VN <u>ALYLV</u> SGDEVQI   | (4)    |

\*The shared homologous region is underlined in each sequence.

1. Gronow S, et al. (2011) Complete genome sequence of *Bacteroides salanitronis* type strain (BL78). *Stand Genomic Sci* 4(2):191–199.
2. Nölling J, et al. (2001) Genome sequence and comparative analysis of the solvent-producing bacterium *Clostridium acetobutylicum*. *J Bacteriol* 183(16):4823–4838.
3. Trott DJ, et al. (2003) Characterization of *Treponema phagedenis*-like spirochetes isolated from papillomatous digital dermatitis lesions in dairy cattle. *J Clin Microbiol* 41(6):2522–2529.
4. Hopkinson BM, Roe KL, Barbeau KA (2008) Heme uptake by *Microscilla marina* and evidence for heme uptake systems in the genomes of diverse marine bacteria. *Appl Environ Microbiol* 74(20):6263–6270.
